# Supplementary material for: Hand/foot splitting and the ‘re-evolution’ of mesopodial skeletal elements during the evolution and radiation of chameleons
Source: PubMed Central journal article supplement (PMC4574539; doi:10.1186/s12862-015-0464-4), 2015-09-18

A) *Sphenodon punctatus*

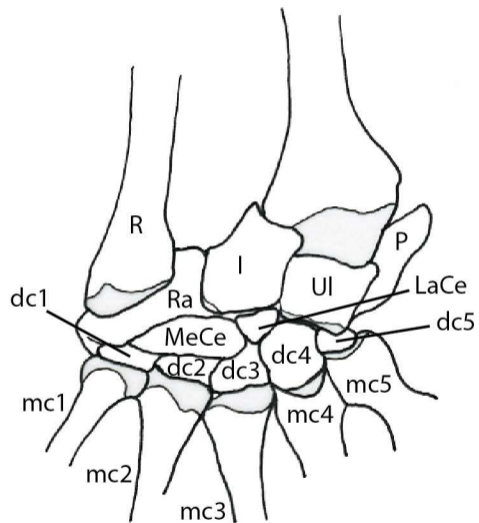

4/7

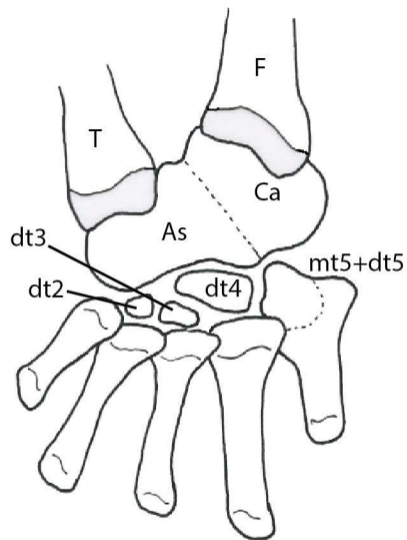

1/3(1?)

B) *Aspidoscelis uniparens* (hatchling)

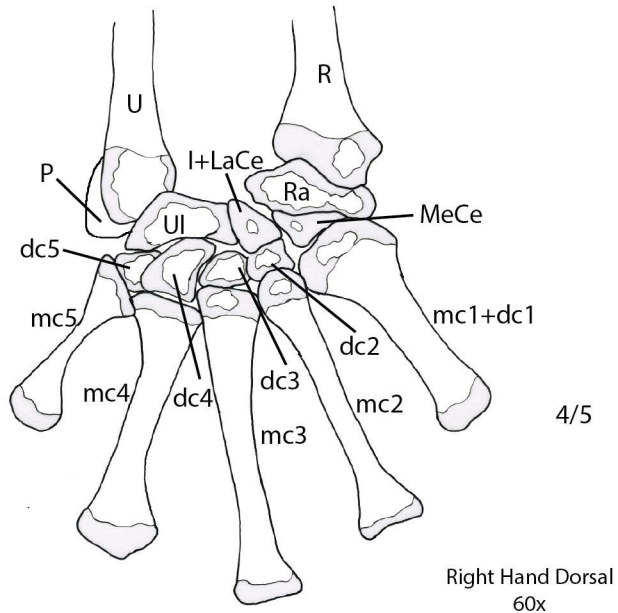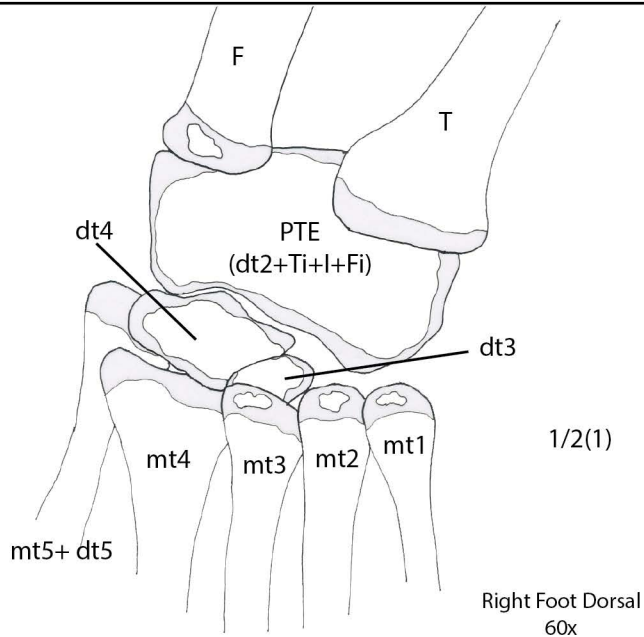

C) *Pogona vitticeps* (juvenile)

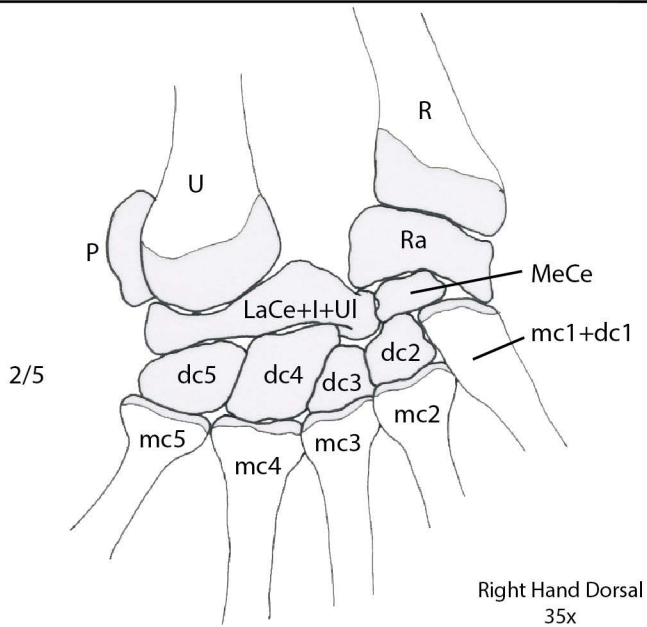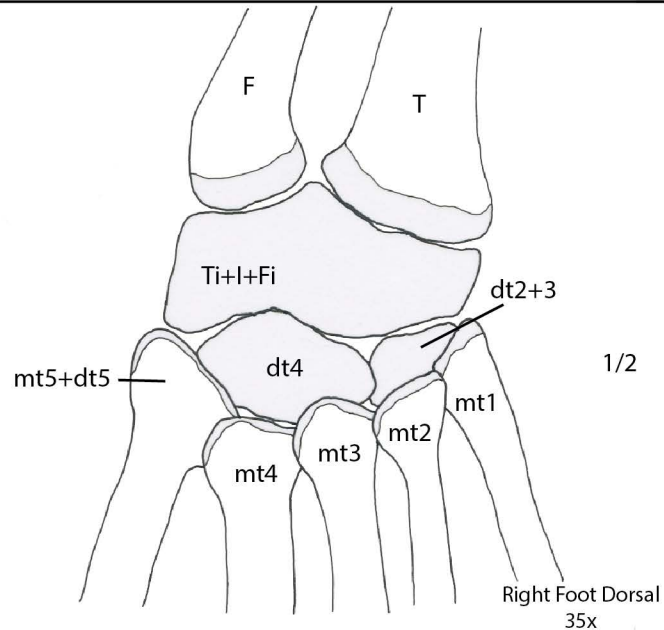

D) *Brookesia stumpffi* CAS 156861

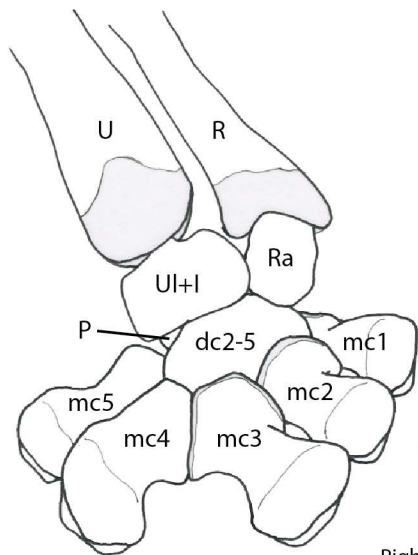

3/1

Right Hand Anterior  
40x

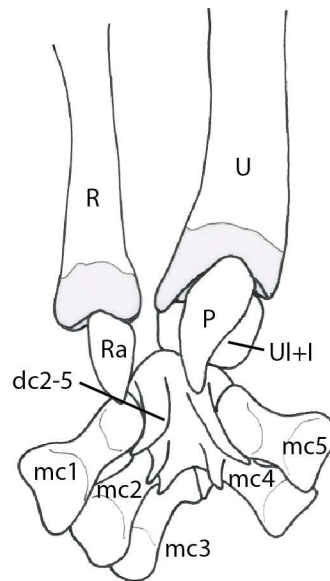

Right Hand Posterior  
37x

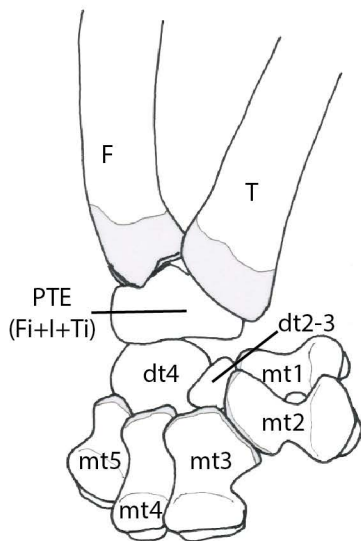

1/2(0)

Right Foot Anterior  
40x

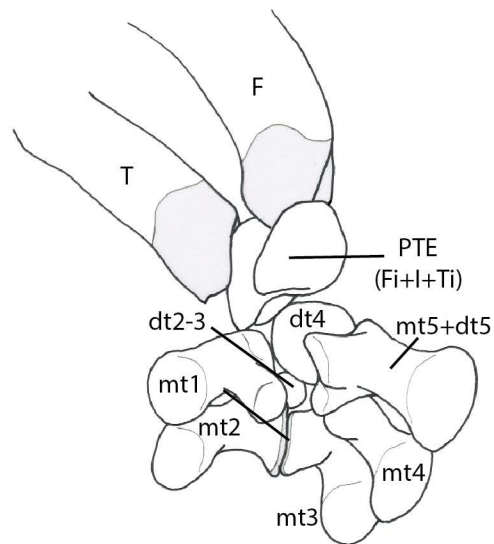

Right Foot Posterior  
40x

E) *Rieppeleon brevicaudatus*

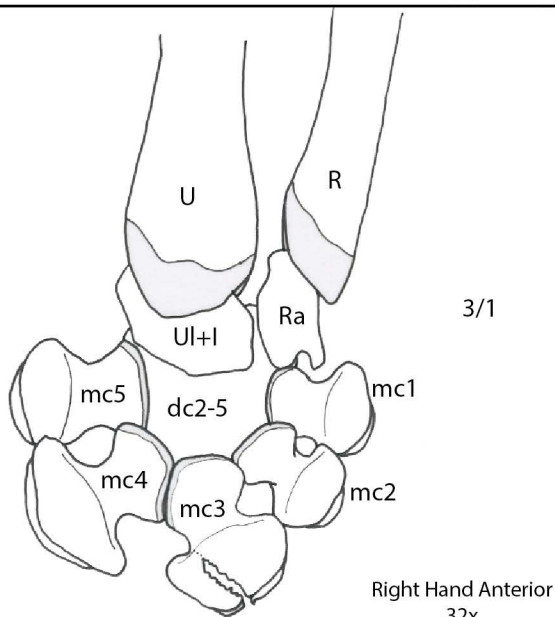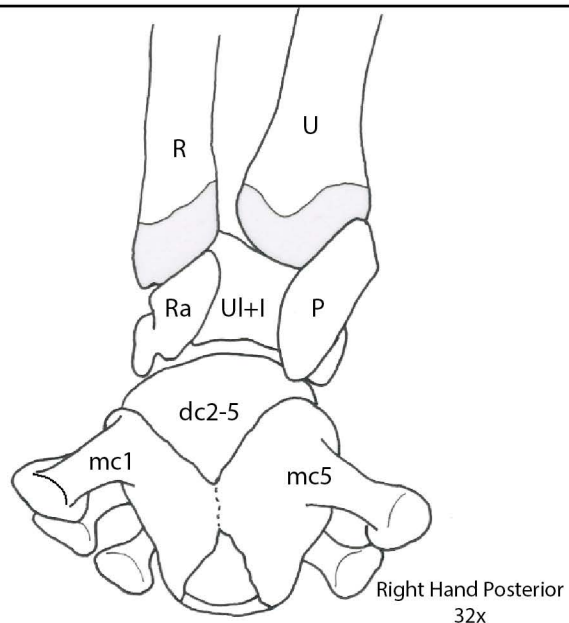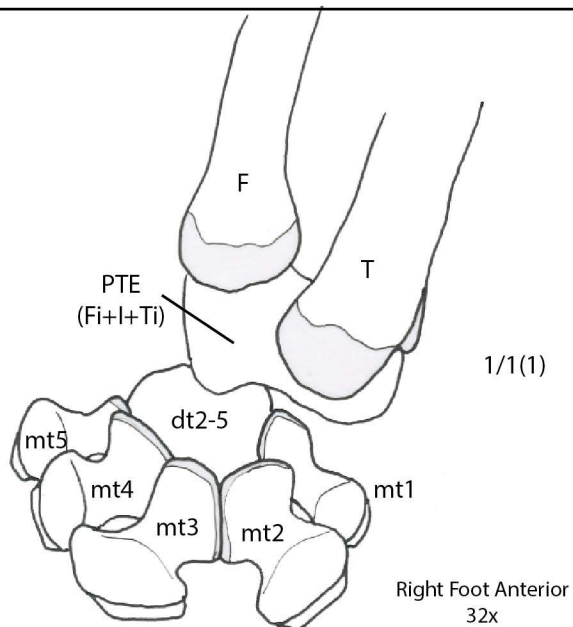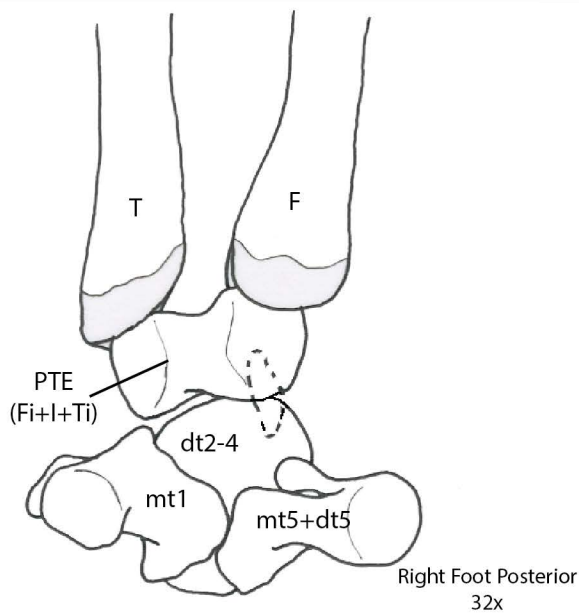

F) *Rhampholeon boulengeri* CAS 176860

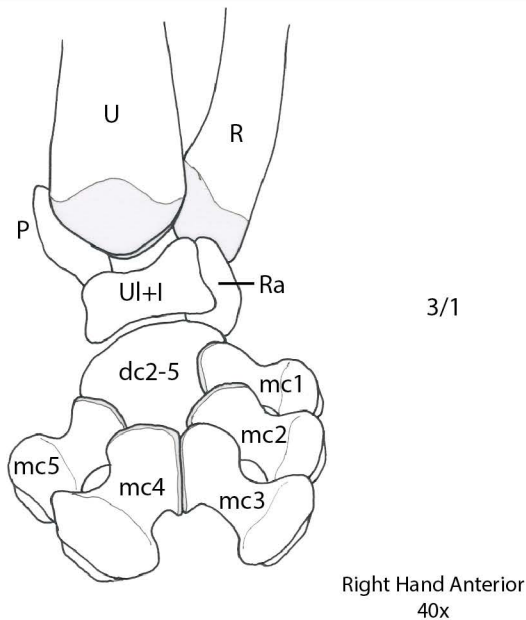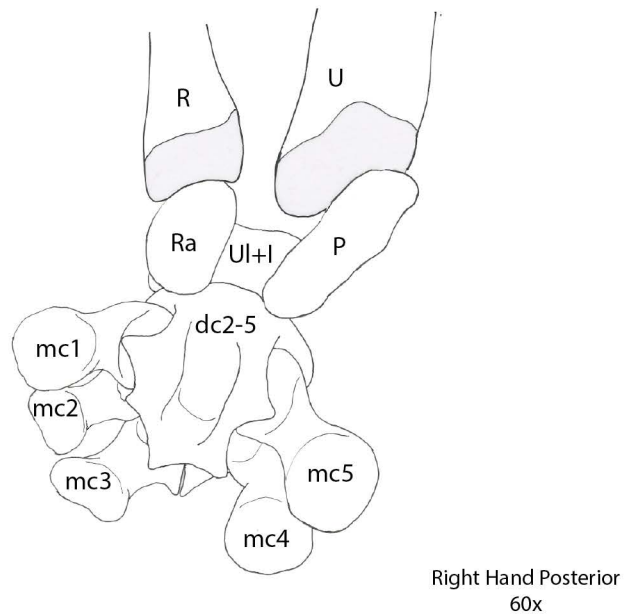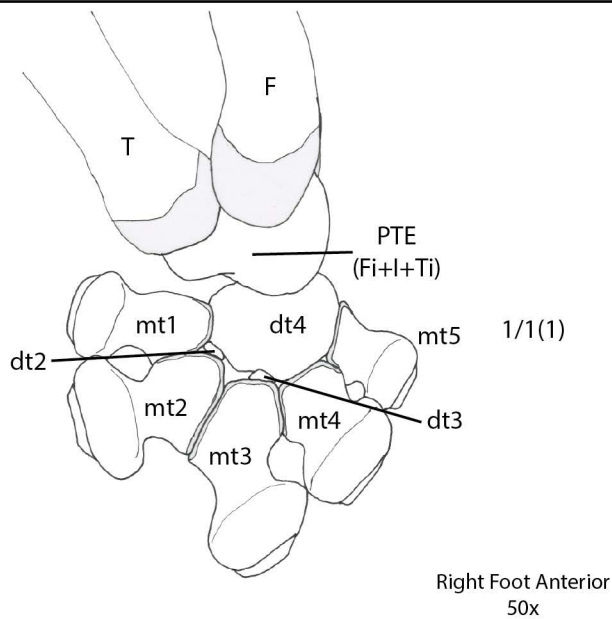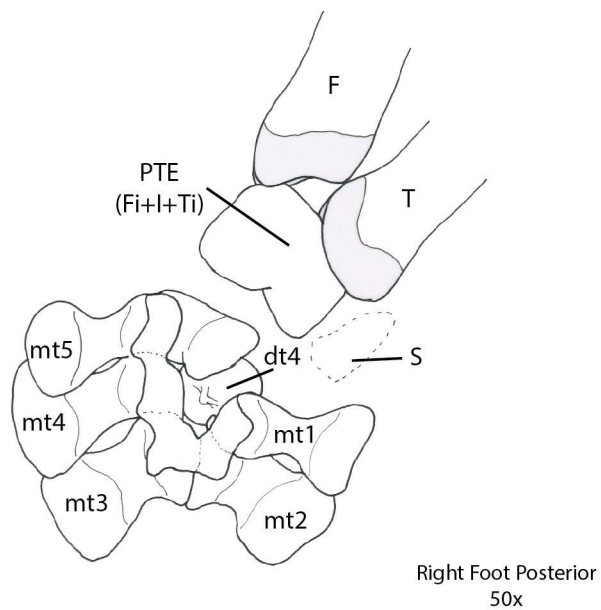

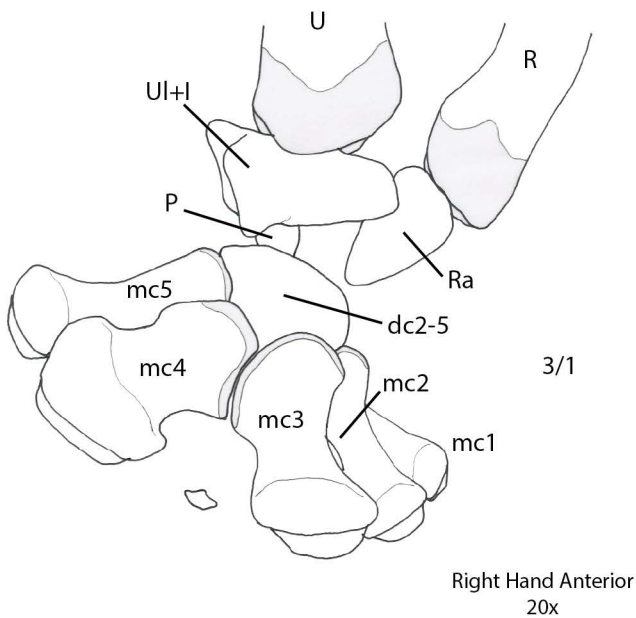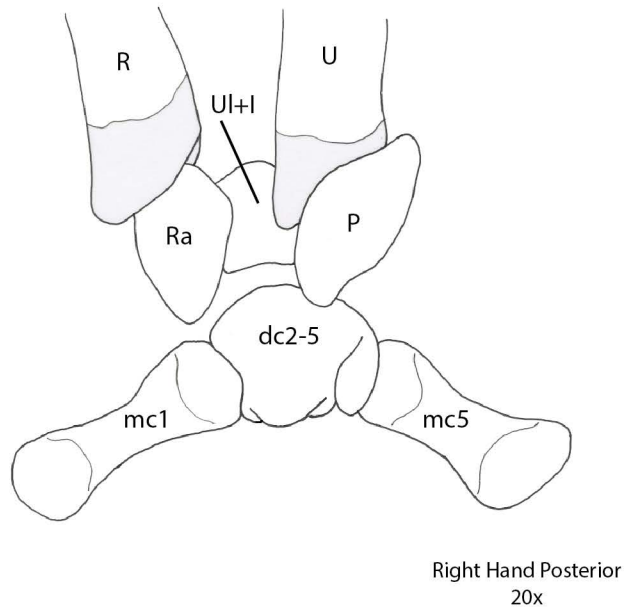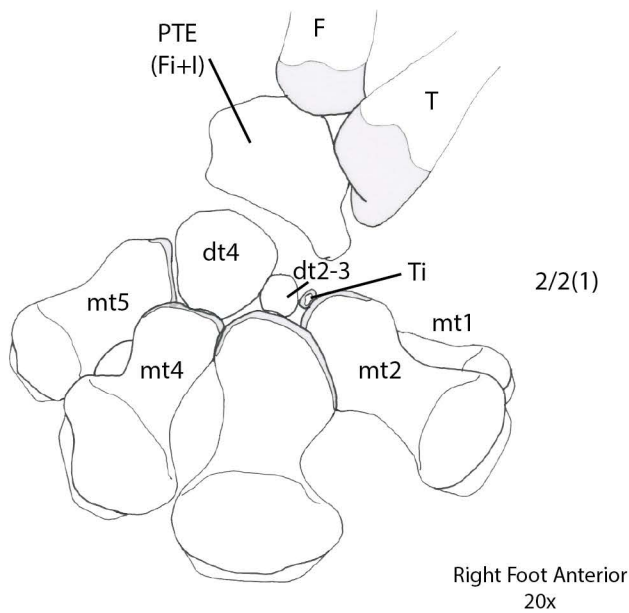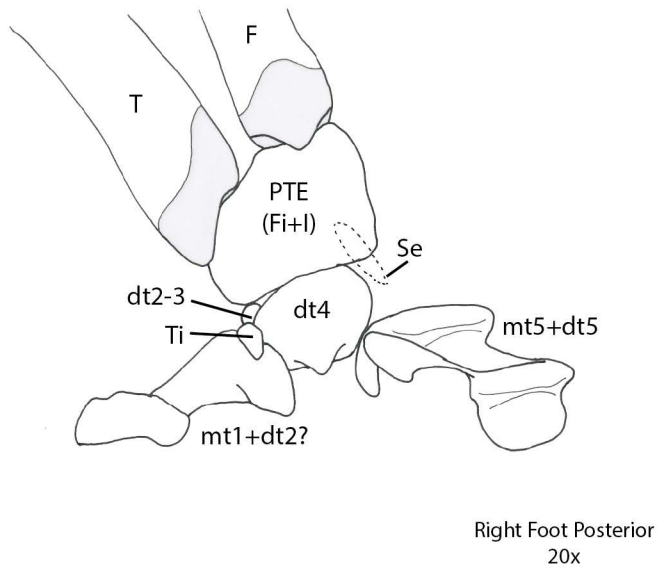

H) *Chamaeleo dilepis* CAS 54687

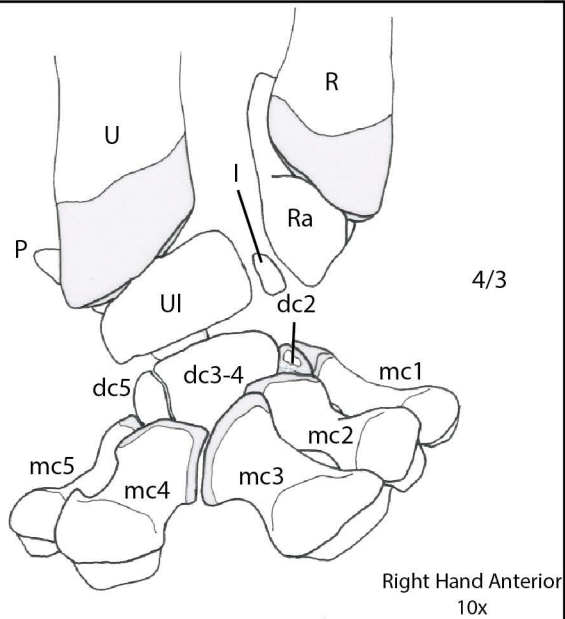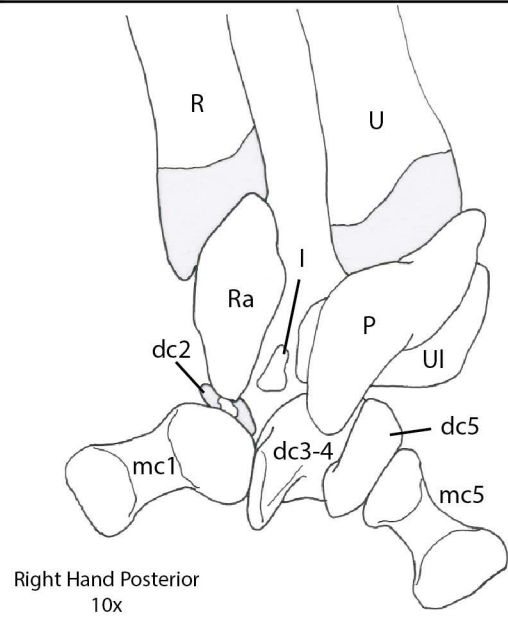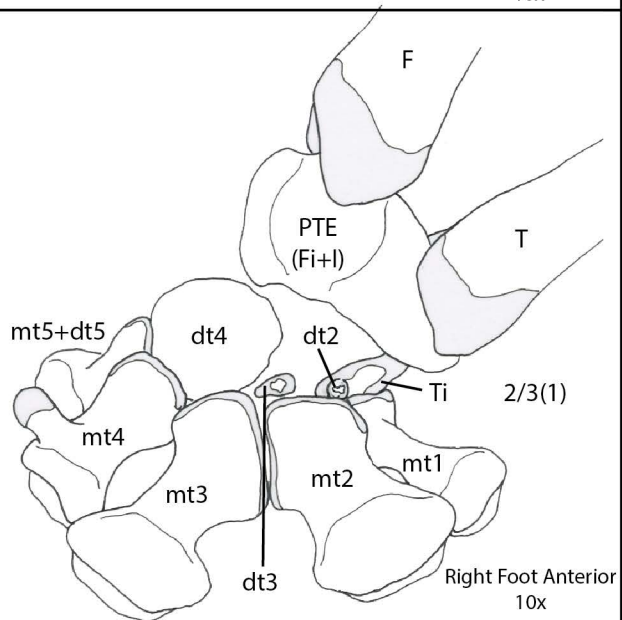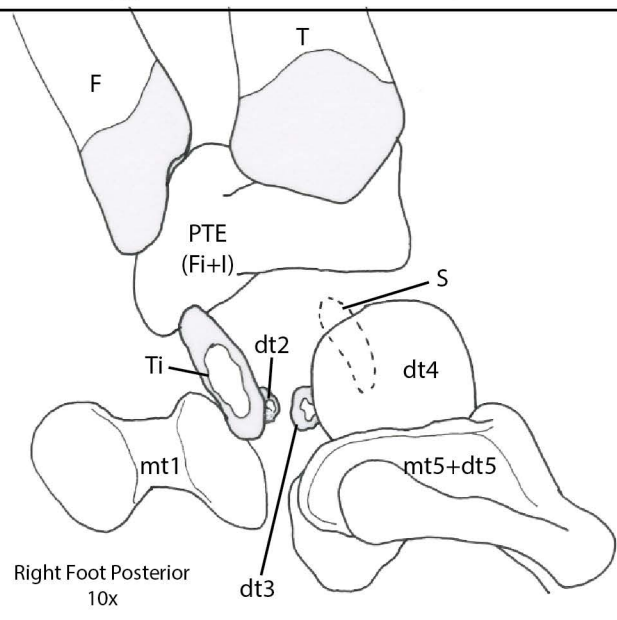



l) *Chamaeleo calypttratus* 7dph male #2

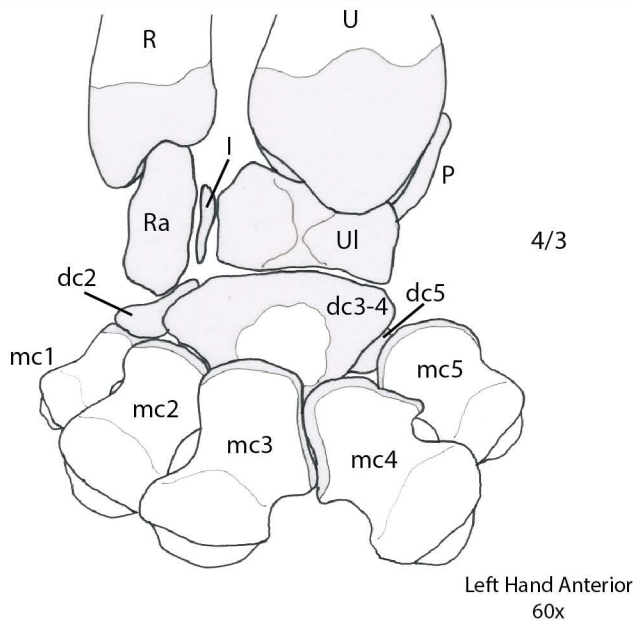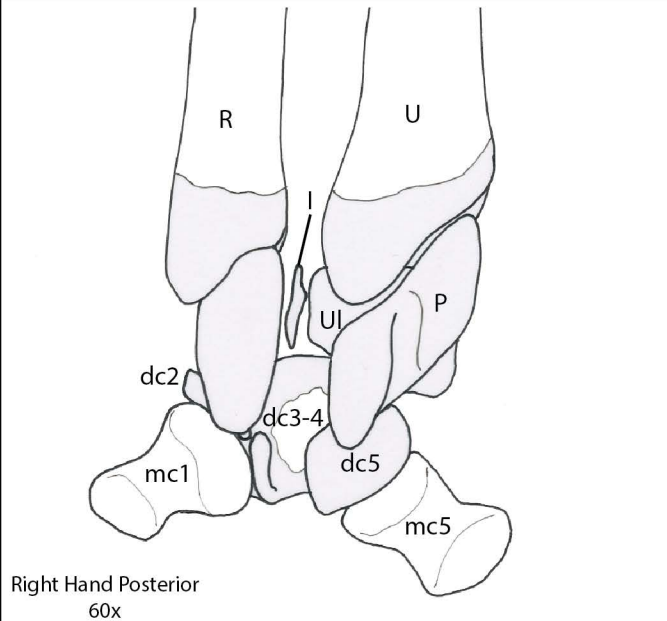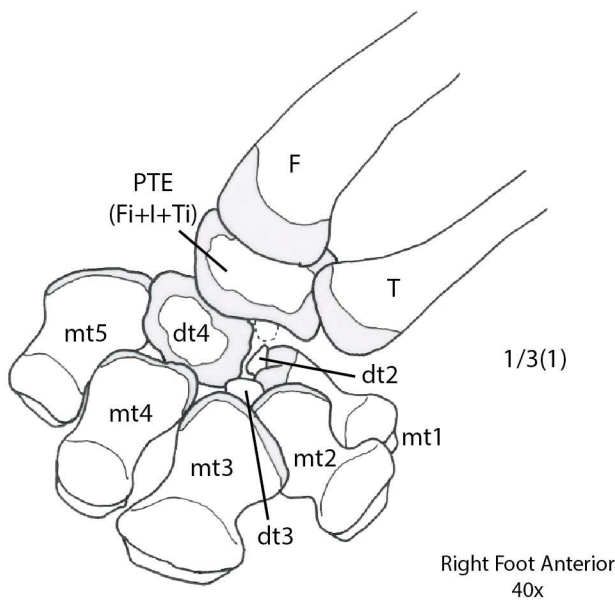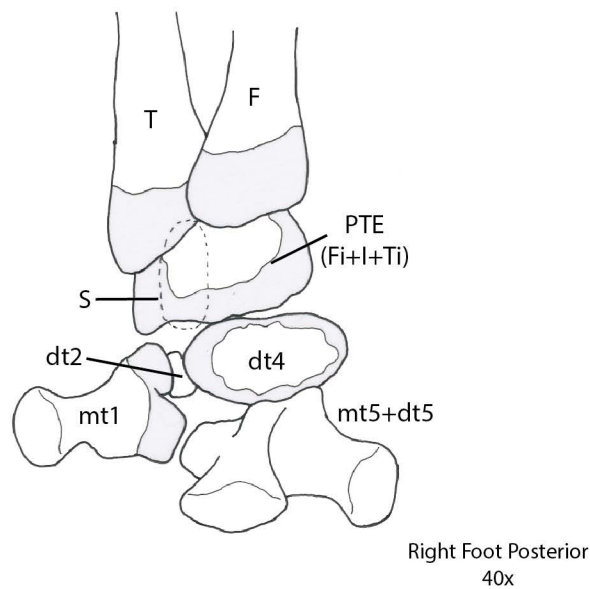

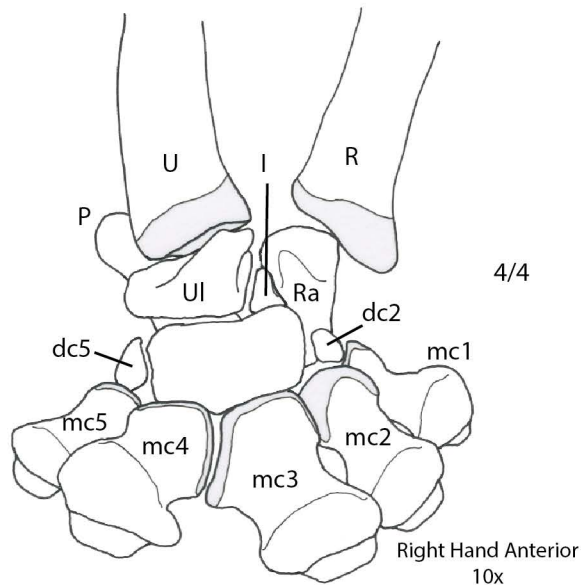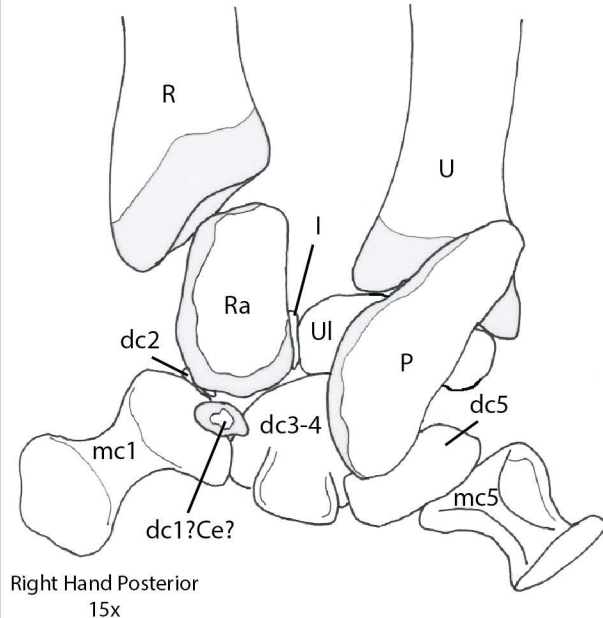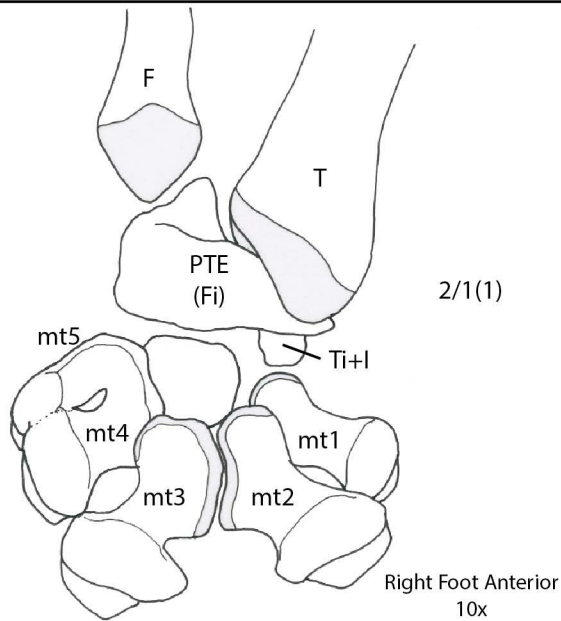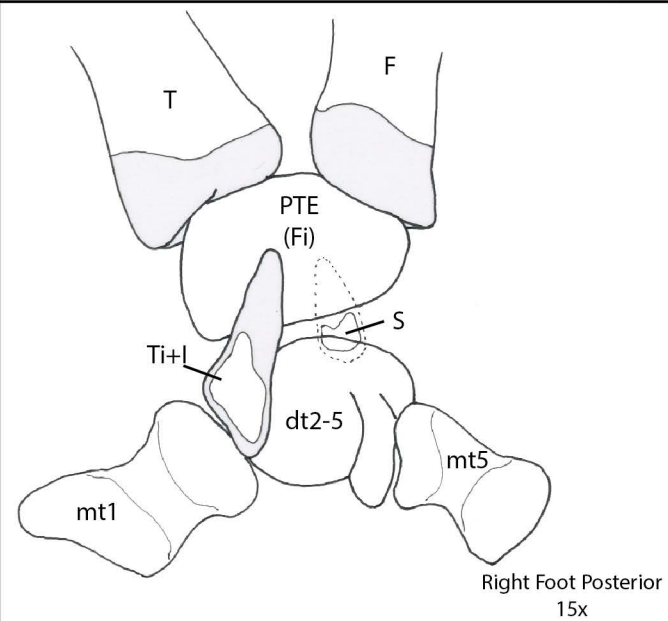

K) *Furcifer lateralis* CAS 123184

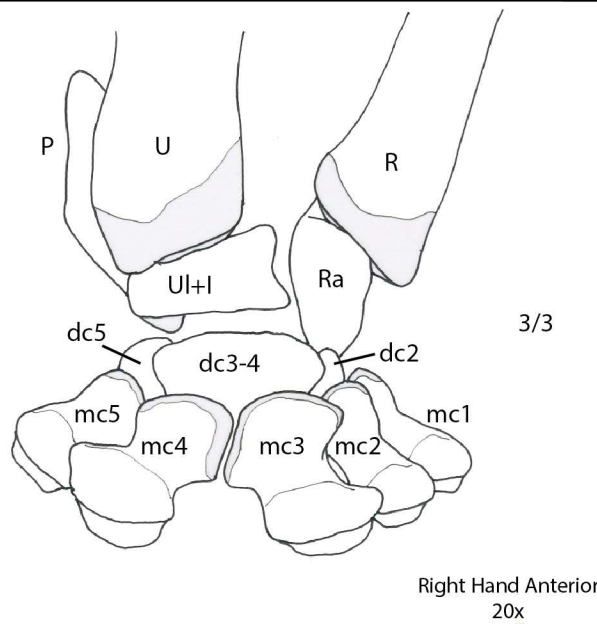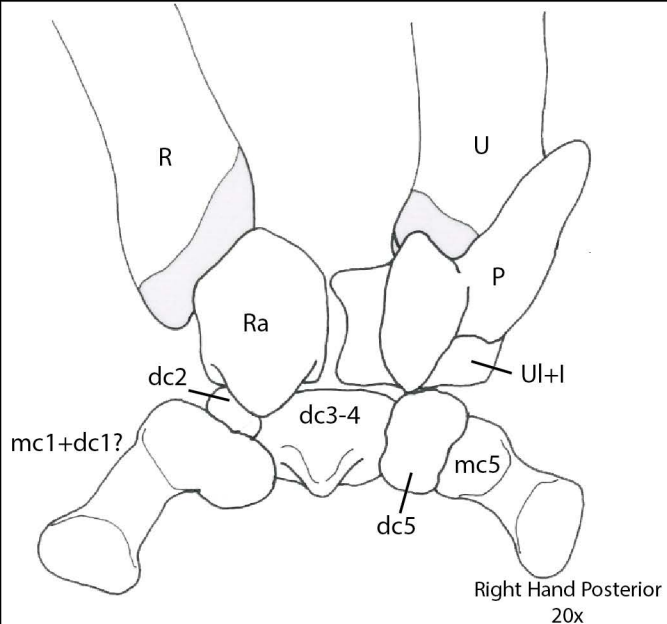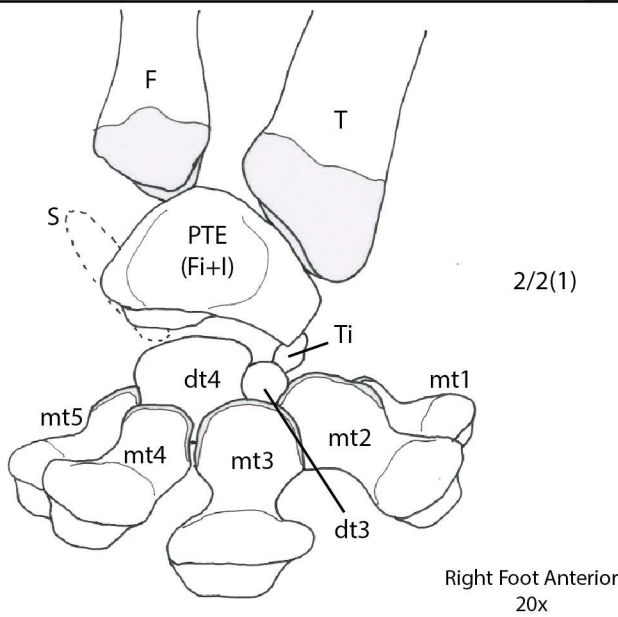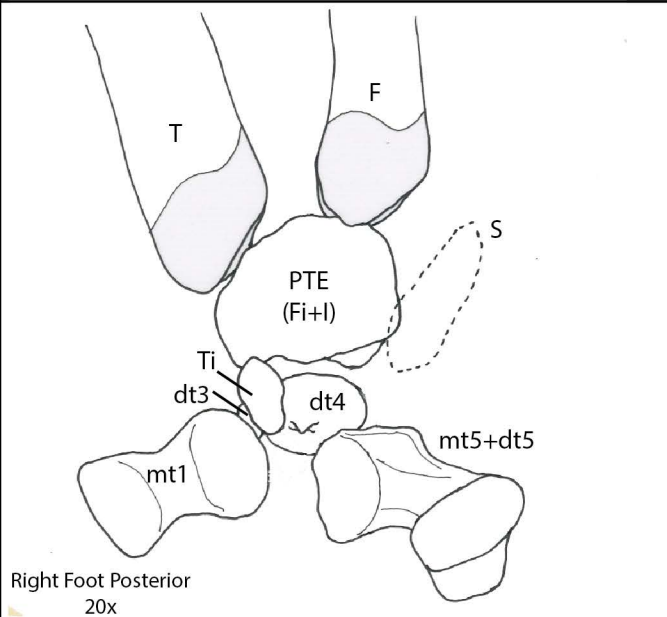

L) *Furcifer pardalis* CAS 156916

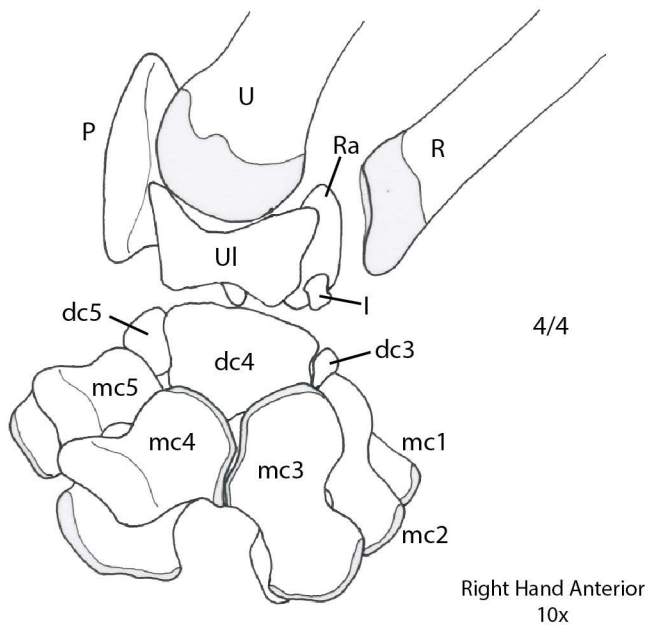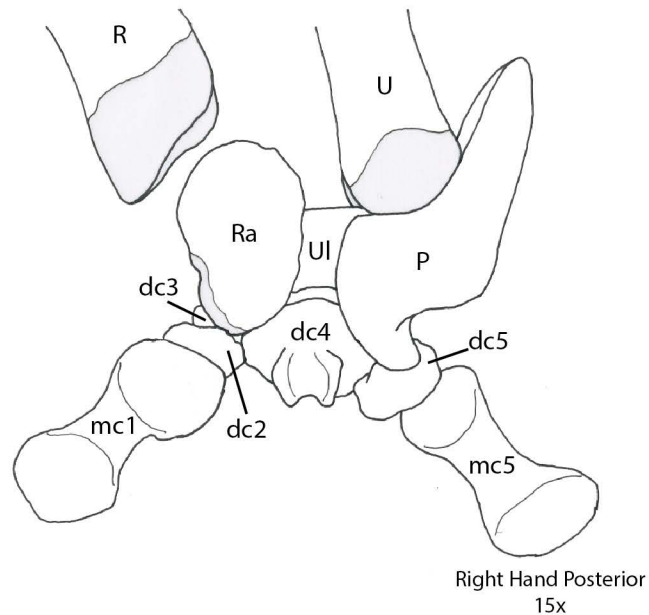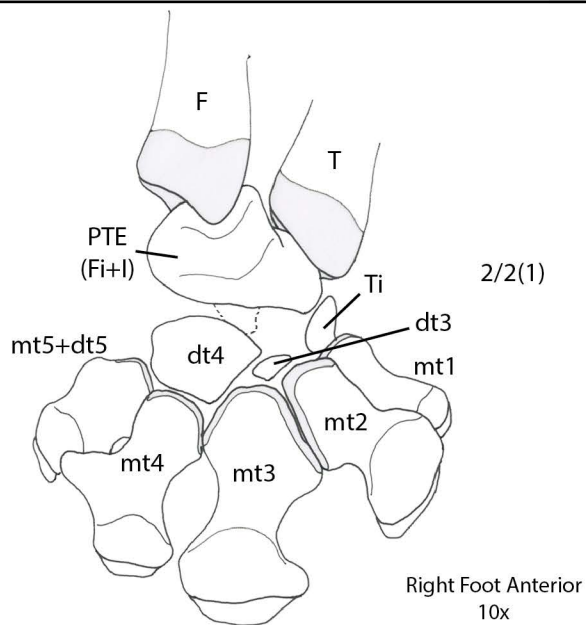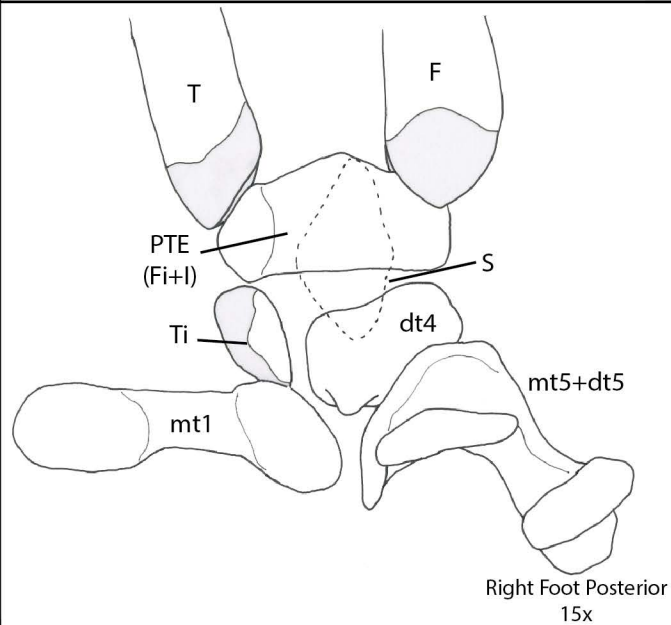

M) *Trioceros ellioti* CAS 201725

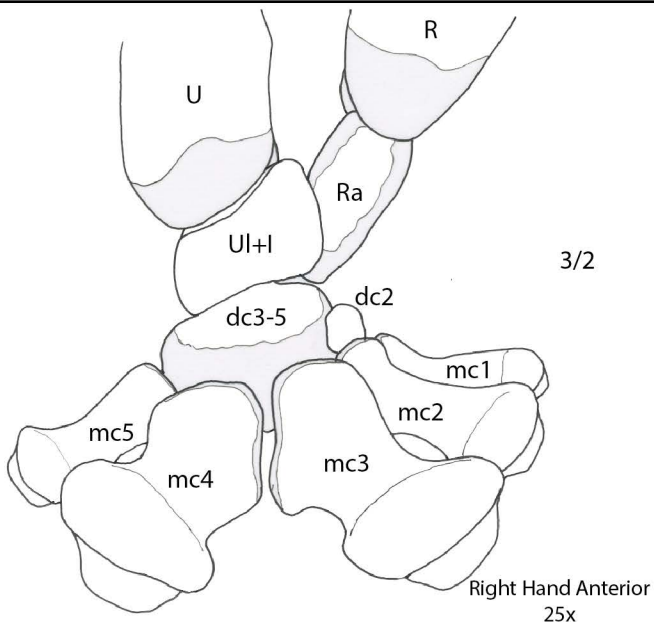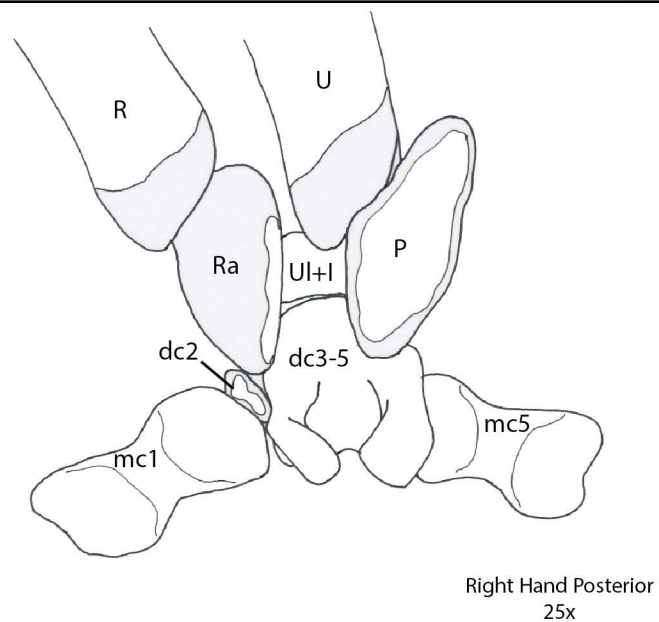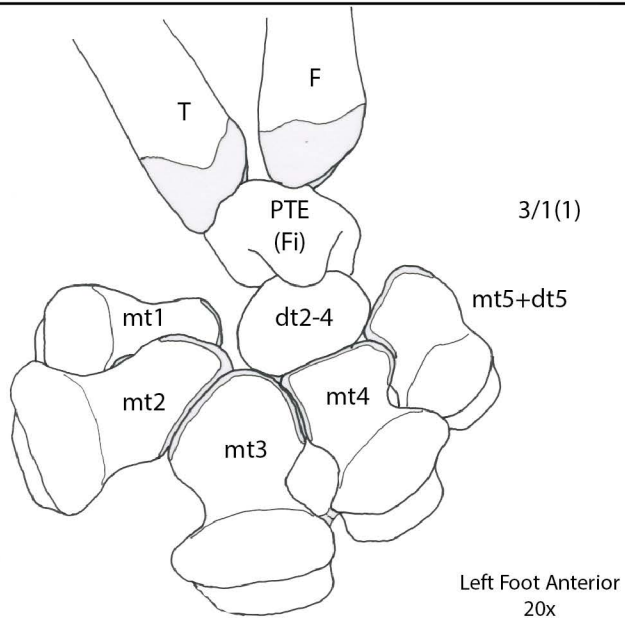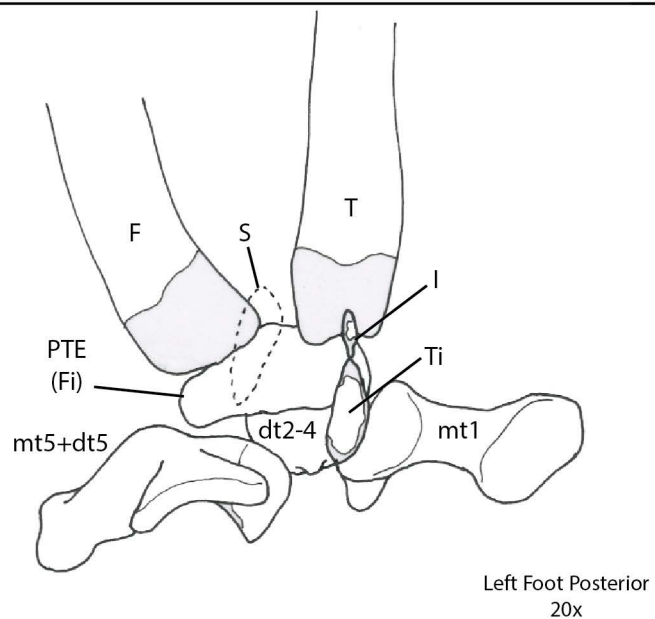

N) *Trioceros hohnelii* CAS 122181

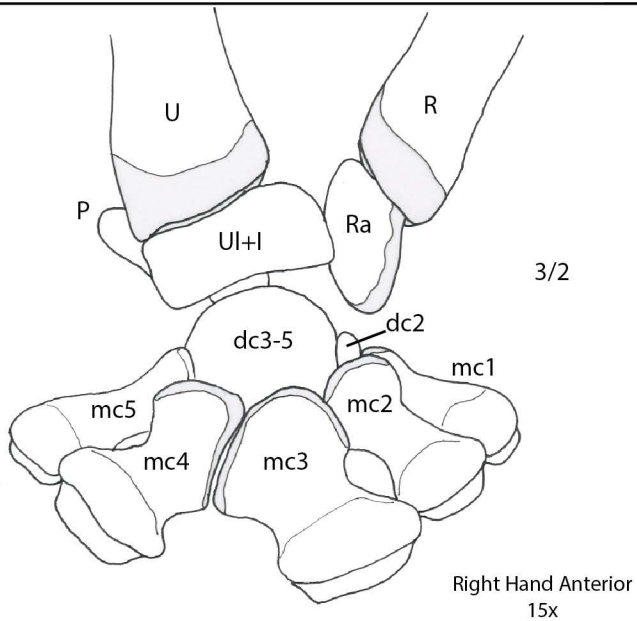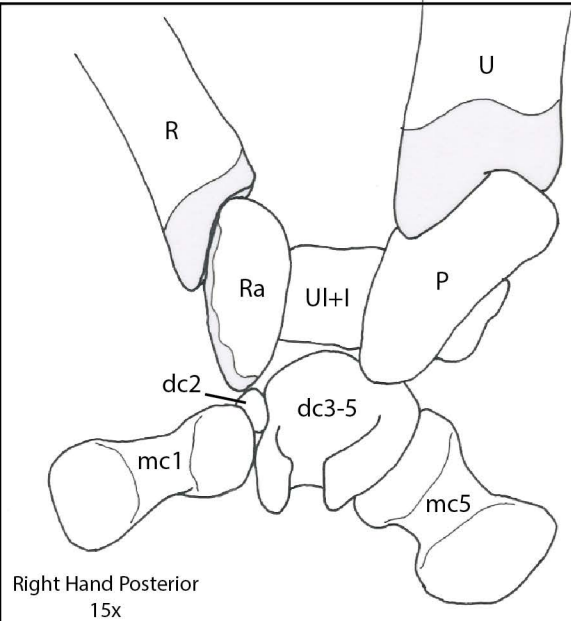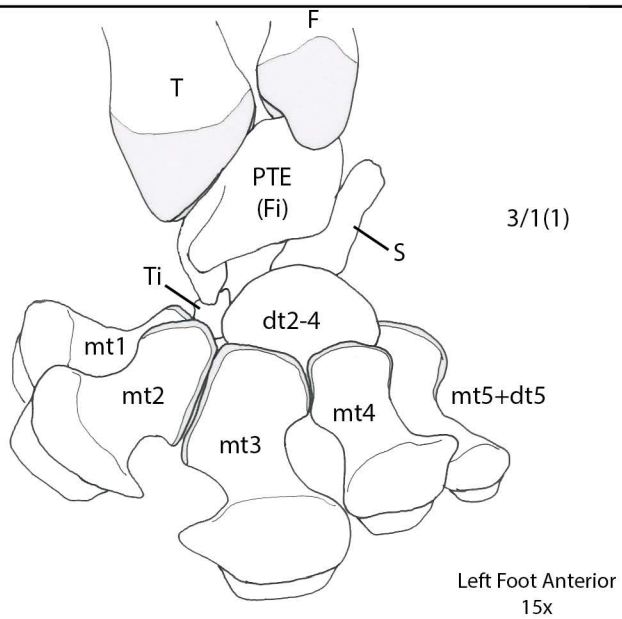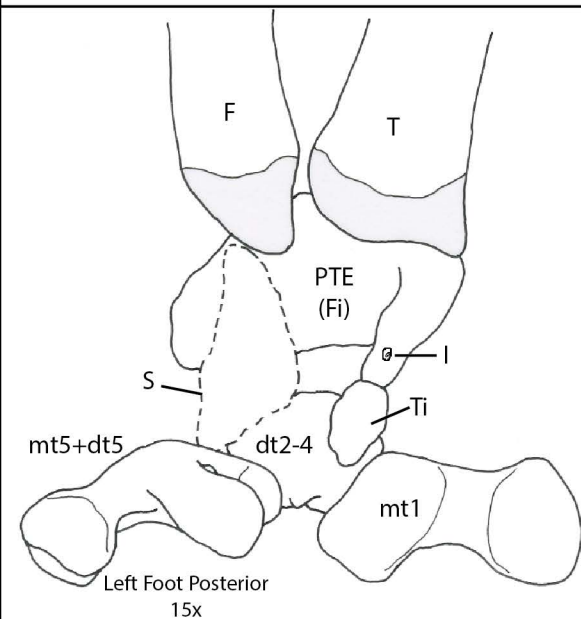

Supplement: 12862_2015_464_MOESM1_ESM.pdf [file 12862_2015_464_MOESM1_ESM.pdf]
